# Supplementary material
Source: PubMed Central journal article supplement (PMC4025580)
Supplement: nl5006349_si_001.pdf [file nl5006349_si_001.pdf]

## Supporting Information

# Scalable Production of Highly-Sensitive Nanosensors Based on Graphene Functionalized with a Designed G Protein-Coupled Receptor

*Mitchell B. Lerner<sup>1,2</sup>, Felipe Matsunaga<sup>3</sup>, Gang Hee Han<sup>1</sup>, Sung Ju Hong<sup>1,5</sup>, Jin Xi<sup>3</sup>, Alexander Crook<sup>1</sup>, Jose Manuel Perez-Aguilar<sup>4□</sup>, Yung Woo Park<sup>5</sup>, Jeffery G. Saven<sup>4</sup>, Renyu Liu<sup>3\*</sup>, A.T. Charlie Johnson<sup>1</sup>*

<sup>1</sup>Department of Physics and Astronomy, University of Pennsylvania, Philadelphia PA 19104, USA

<sup>2</sup>Functional Nano Devices Lab, SPAWAR Systems Center Pacific, San Diego CA 92152 USA

<sup>3</sup>Department of Anesthesiology and Critical Care, University of Pennsylvania, Philadelphia PA 19104, USA

<sup>4</sup>Department of Chemistry, University of Pennsylvania, Philadelphia PA 19104, USA

<sup>5</sup>Department of Physics and Astronomy, Seoul National University, 1 Gwanak-ro, Gwanak-gu, Seoul, 151-747, Korea

<sup>#</sup>Present address: Department of Physiology and Biophysics, Weill Medical College of Cornell University, New York, New York, USA

## 1 Raman Spectrum of Graphene Field Effect Transistor (GFET) Channel Region

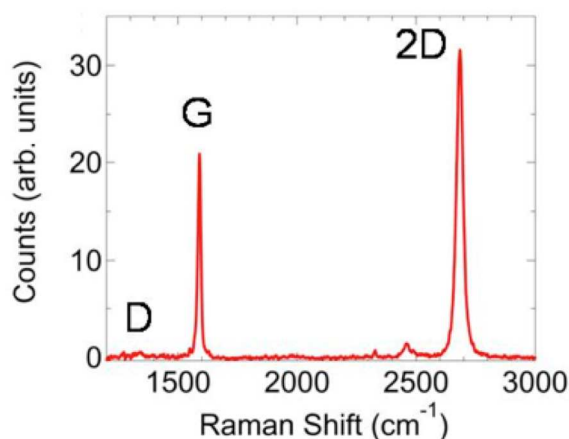

*Figure S1.* Raman spectrum from the channel region of a GFET device shows small D/G ratio, G/2D ratio of  $\sim 1.5$ , and the full width at half maximum of the 2D peak of  $\sim 30$  cm<sup>-1</sup>, all indicative of high quality monolayer graphene.

## 2 Protein Functionalization Control Experiment

To confirm the efficacy of the functionalization procedure, we performed a control measurement of the mu receptor protein (MUR) attachment density for a sample that was *not* incubated in diazonium but received the subsequent attachment chemistry. Without the diazonium anchor, the remaining chemistry proved ineffective at immobilizing MUR. As shown in Supplementary Figure 2, the density of protein attachment on the graphene sheet (3 proteins over 12  $\mu\text{m}^2 = 0.25$  proteins/ $\mu\text{m}^2$ ) was comparable to the density seen on SiO<sub>2</sub> for the functionalized sample (0.55 proteins/ $\mu\text{m}^2$ ) and significantly less than the density of proteins for the functionalized sample (4.7 proteins/ $\mu\text{m}^2$ ). This experiment provided compelling evidence that the proteins are bound to the graphene by the covalent attachment chemistry and not simply through non-specific adsorption.

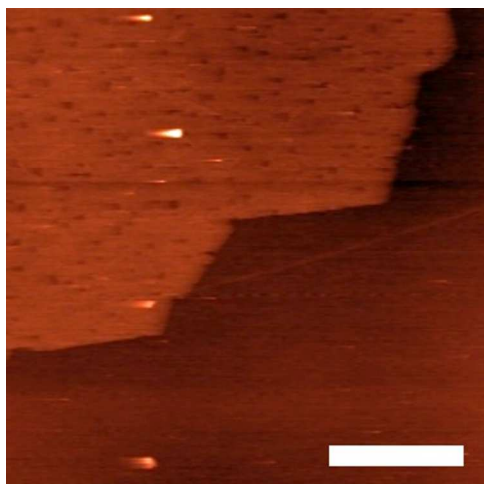

*Figure S1:* AFM image of graphene surface (top left) and bare SiO<sub>2</sub> (bottom right) after performing the protein attachment chemistry with the diazonium functionalization step omitted. The density of adsorbed proteins (3 proteins over 12  $\mu\text{m}^2$ ) is comparable to the density of proteins adsorbed to the SiO<sub>2</sub> on the functionalized sample. Scale bar is 2  $\mu\text{m}$ . Vertical scale is 10 nm

### 3 Use of Raman Spectroscopy for Sensor Readout

Along with the electronic readout discussed in the main text, we also found that Raman spectroscopy could be used to monitor the sensors, and we observed Raman shifts that were sensitive to the presence and concentration of naltrexone. The Raman spectrum was collected from GFET channel regions after each step of the protein-functionalization process (Supp. Fig. 4). Enhancement of the D-band and a reduction of the 2D/G ratio were both observed after the diazonium incubation step, consistent with the formation of sp<sup>3</sup> bonded sites<sup>1</sup>. Exposure to naltrexone led to a shift in the position of the G peak as well as the 2D peak, which are indicative of an increase in the number of charged dopants present<sup>2,3</sup>. The Raman shifts varied with naltrexone concentration, and they were consistent with the shifts in the location of the Dirac voltage discussed in the main text.

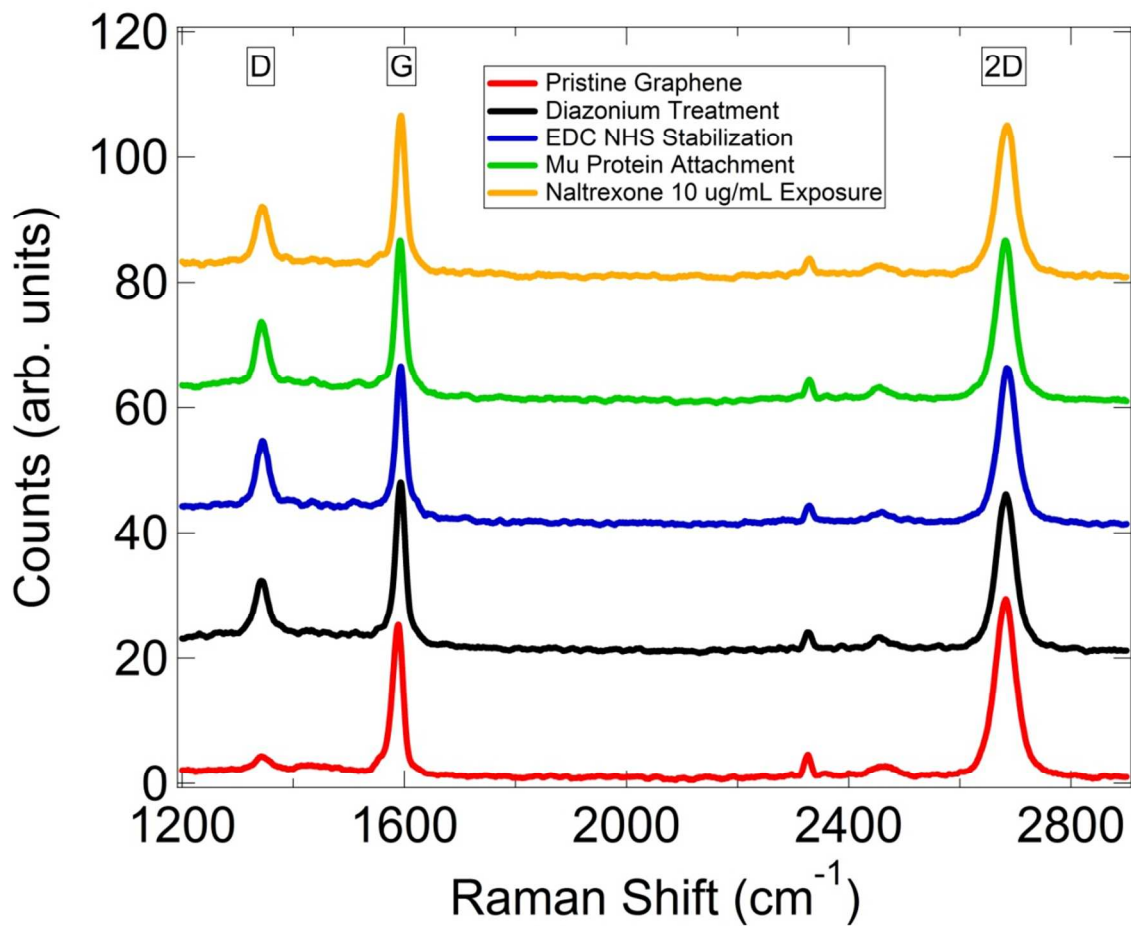

*Figure S2.* Raman spectra taken on GFET channel regions after successive functionalization steps. As discussed in the main text, the D/G ratio increased after diazonium treatment due to the formation of  $sp^3$  hybridized defect sites. An additional signature of defect formation/doping was the decrease in the 2D/G ratio from 1.5 to 0.95. There was little change between diazonium treatment and mu protein attachment. Upon exposure to Naltrexone, there were significant shifts in the G-peak and 2D peak positions which were concentration dependent (Supp. Fig 4).

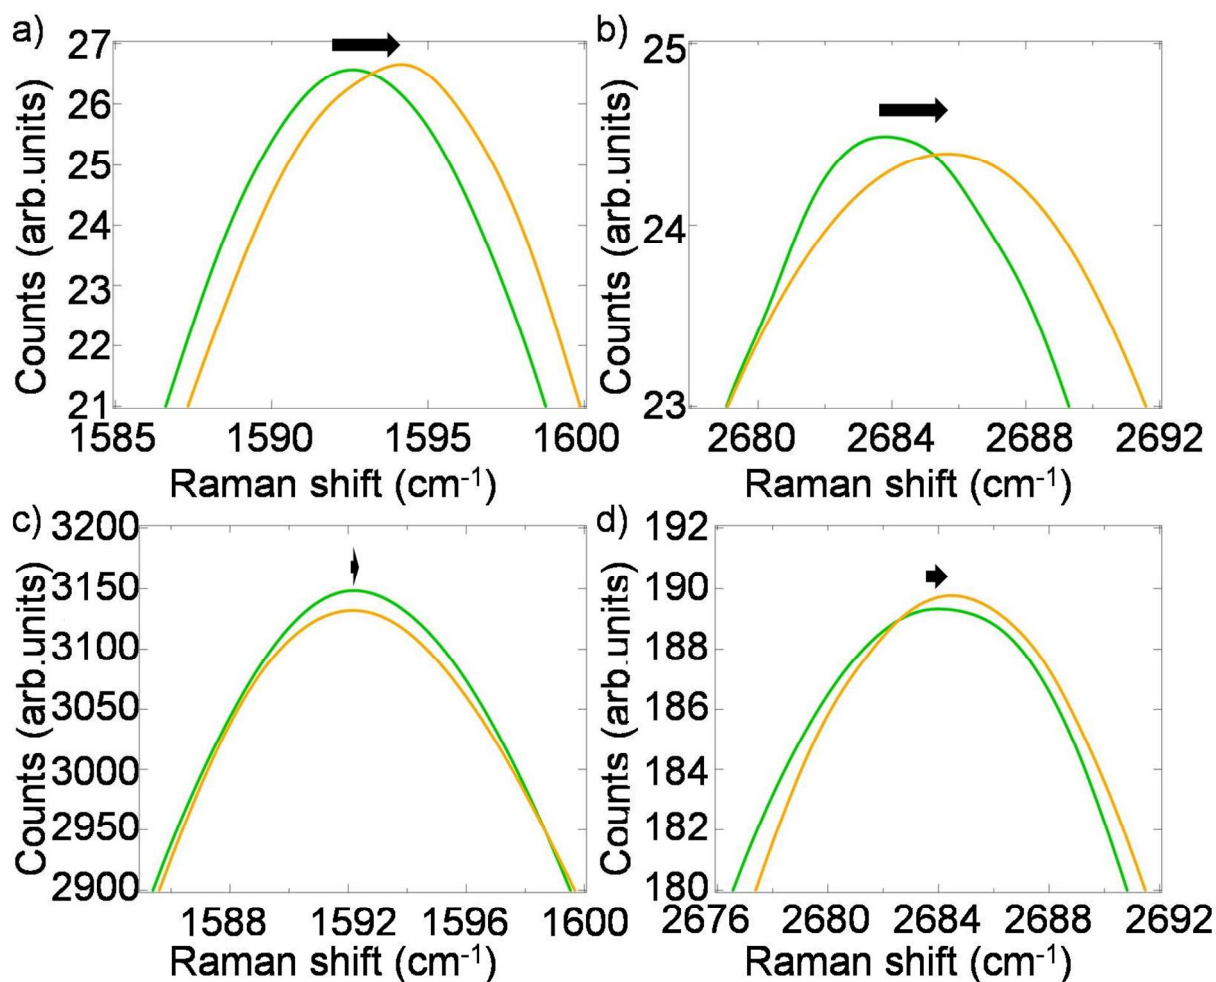

*Figure S3.* a) Mu protein-functionalized device showing Raman G peak shift of  $\sim 1.5 \text{ cm}^{-1}$  before (green) and after (orange) Naltrexone exposure at  $10 \mu\text{g/mL}$ . b) Same device as (a) showing a shift in the 2D peak position of  $\sim 2 \text{ cm}^{-1}$ . c) Device from the same array treated analogously as sample from (a) and (b) but exposed to buffer not containing Naltrexone. G peak does not appreciably shift. d) The 2D peak position is only slightly affected by buffer exposure, shifting only  $0.5 \text{ cm}^{-1}$  for this device.

**Table S1.** Measured shift of the Raman G-peak with naltrexone concentration (7-10 GFET devices tested for each condition)

| naltrexone concentration | Average G peak position after protein | Average G peak position after analyte | Average G peak shift | st error |
|--------------------------|---------------------------------------|---------------------------------------|----------------------|----------|
| 0 (buffer control)       | 1592.06 ± 0.14                        | 1592.17 ± 0.23                        | 0.11                 | 0.27     |
| 10 ng/mL                 | 1590.45 ± 0.20                        | 1591.61 ± 0.13                        | 1.16                 | 0.24     |
| 10 ug/mL                 | 1592.86 ± 0.14                        | 1594.39 ± 0.15                        | 1.53                 | 0.21     |

**Table S2.** Measured shift of the Raman 2D-peak with naltrexone concentration (7-10 GFET devices tested for each condition)

| naltrexone concentration | Average 2D peak position after protein | Average 2D peak position after analyte | Average 2D peak shift | st error |
|--------------------------|----------------------------------------|----------------------------------------|-----------------------|----------|
| 0 (buffer control)       | 2683.96 ± 0.27                         | 2684.38 ± 0.33                         | 0.42                  | 0.23     |
| 10 ng/mL                 | 2682.10 ± 0.19                         | 2683.19 ± 0.20                         | 1.09                  | 0.28     |
| 10 ug/mL                 | 2683.86 ± 0.22                         | 2685.83 ± 0.26                         | 1.97                  | 0.34     |

## References

1. Eckmann, A.; Felten, A.; Mishchenko, A.; Britnell, L.; Krupke, R.; Novoselov, K. S.; Casiraghi, C., Probing the Nature of Defects in Graphene by Raman Spectroscopy. *Nano Lett.* **2012**, *12*, 3925-3930.
2. Dresselhaus, M. S.; Dresselhaus, G.; Pimenta, M. A.; Malard, L. M., Raman Spectroscopy in Graphene. *Phys. Rep.* **2009**, *473*, 51-87.
3. Das, A.; Pisana, S.; Chakraborty, B.; Piscanec, S.; Saha, S. K.; Waghmare, U. V.; Novoselov, K. S.; Krishnamurthy, H. R.; Geim, A. K.; Ferrari, A. C., *et al.*, Monitoring Dopants by Raman Scattering in an Electrochemically Top-Gated Graphene Transistor. *Nat. Nanotechnol.* **2008**, *3*, 210-215.
